# Supplementary material for: Reducing interfacial resistance of a Li1.5Al0.5Ge1.5(PO4)3 solid electrolyte/electrode interface by polymer interlayer protection
Source: Royal Society of Chemistry journal article supplement (doi:10.1039/d0ra00829j), 2020-01-01
Supplement: d0ra00829j1.pdf [file d0ra00829j1.pdf]

## Supporting Information

# Reducing interfacial resistance of $\text{Li}_{1.5}\text{Al}_{0.5}\text{Ge}_{1.5}(\text{PO}_4)_3$ solid electrolyte/electrode interface by polymer interlayer protection

*Leidanyang Wang,<sup>a</sup> Da Liu,<sup>b</sup> Tao Huang,<sup>a</sup> Zhen Geng,<sup>c</sup> Aishui Yu<sup>a,b,\*</sup>*

<sup>a</sup>Laboratory of Advanced Materials, Institute of New Energy, Fudan University, Shanghai 200438, China

<sup>b</sup>Department of Chemistry, Shanghai Key Laboratory of Molecular Catalysis and Innovative Materials, Collaborative Innovation Center of Chemistry for Energy Materials, Fudan University, Shanghai 200438, China

<sup>c</sup>Shanghai Electric Group Co., Ltd. Central Academe, No. 960 Zhongxing Road, Shanghai, 200070, China

### AUTHOR INFORMATION

#### **Corresponding Author**

E-mail: [asyu@fudan.edu.cn](mailto:asyu@fudan.edu.cn).

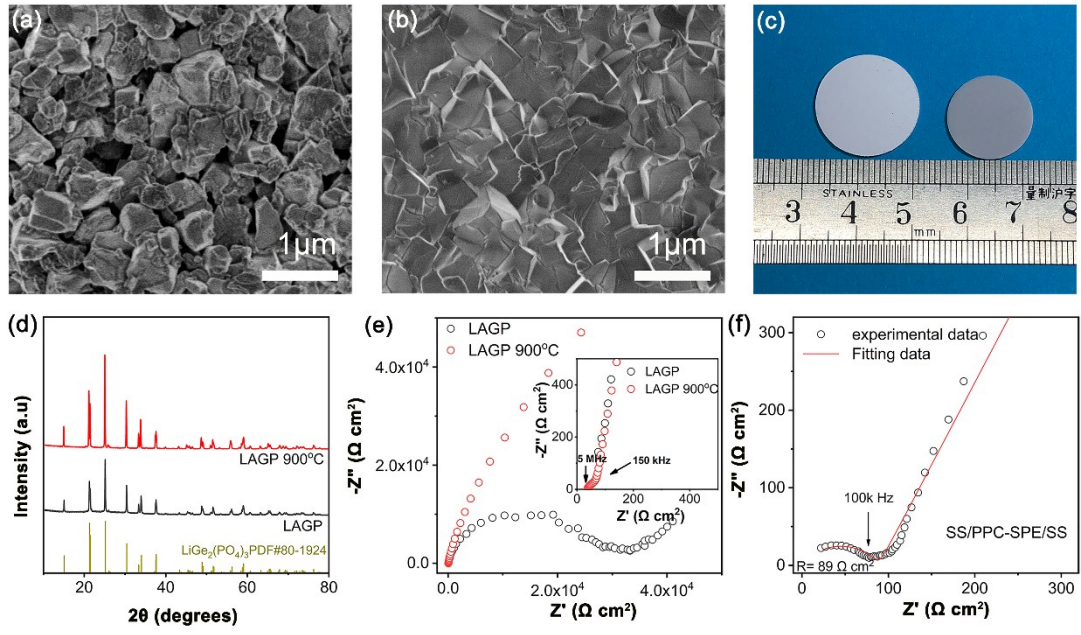

**Figure S1.** (a) Cross-sectional SEM image of the LAGP pallet before and after (b) sintering. (c) Photographs, XRD patterns (d) and EIS plots (e) of the LAGP pellet before and after sintering. (f) EIS plot of the PPC-SPE membrane.

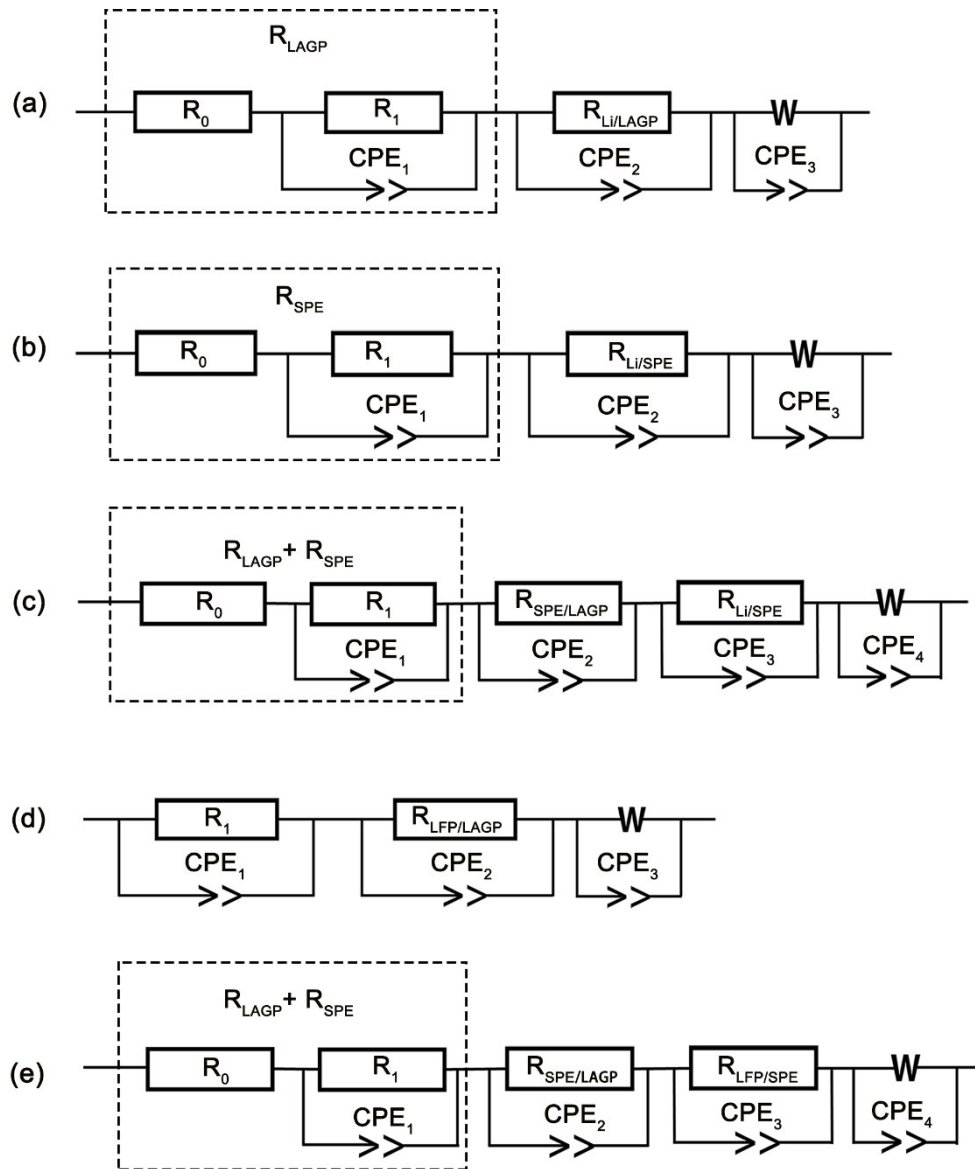

**Figure S2.** Equivalent circuits for different symmetric cells in Figure 2. (a) Equivalent circuit for Li/LAGP/Li symmetric cell. (b) Equivalent circuit for Li/PPC-SPE/Li symmetric cell. (c) Equivalent circuit for Li/PLSSCE/Li symmetric cell. (d) Equivalent circuit for LFP/LAGP/LFP symmetric cell. (e) Equivalent circuit for LFP/PLSSCE/LFP symmetric cell.

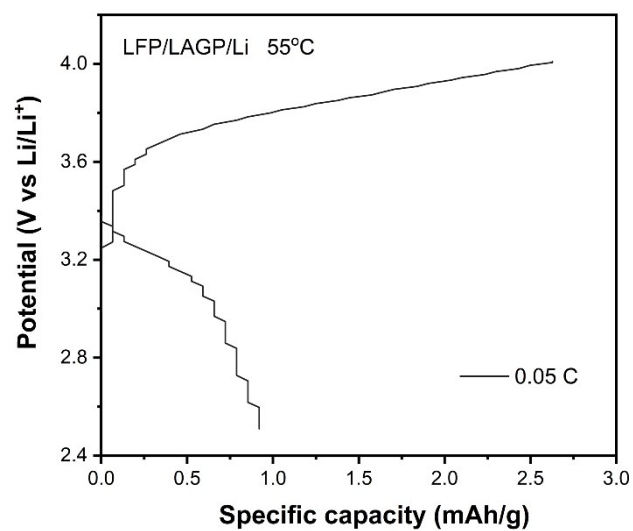

**Figure S3.** Charge–discharge profile of LFP/LAGP/Li cell without PPC-SPE interlayers at 0.05 C.
